# Supplementary material for: Hydroformylation of branched olefins catalyzed by Co2(CO)8 for synthesis of branched alcohol ethoxylates and their surfactant properties
Source: publisher site journal article supplement (doi:10.1515/tsd-2024-2598), 2024-08-06
Supplement: Supplementary file 1 [file j_tsd-2024-2598_suppl_001.docx]

**Supplementary Material**

**Hydroformylation of branched olefins catalyzed by Co2(CO)8 for synthesis of branched alcohol ethoxylates and their surfactant properties**

Jiawei Zhai1, Zexiang Bi1, Geng Chen1, Xu Li 1*, Jinxiang Dong 1,*

1 *College of Chemical Engineering and Technology, Shanxi Key Laboratory of Chemical Product Engineering, Taiyuan University of Technology, Taiyuan 030024, Shanxi, China*

* Corresponding author. Jinxiang Dong, Xu Li;

E-mail address: dongjinxiangwork@hotmail.com, lixu0121@126.com

**1. Characterization of the materials**

***1.1 GC***


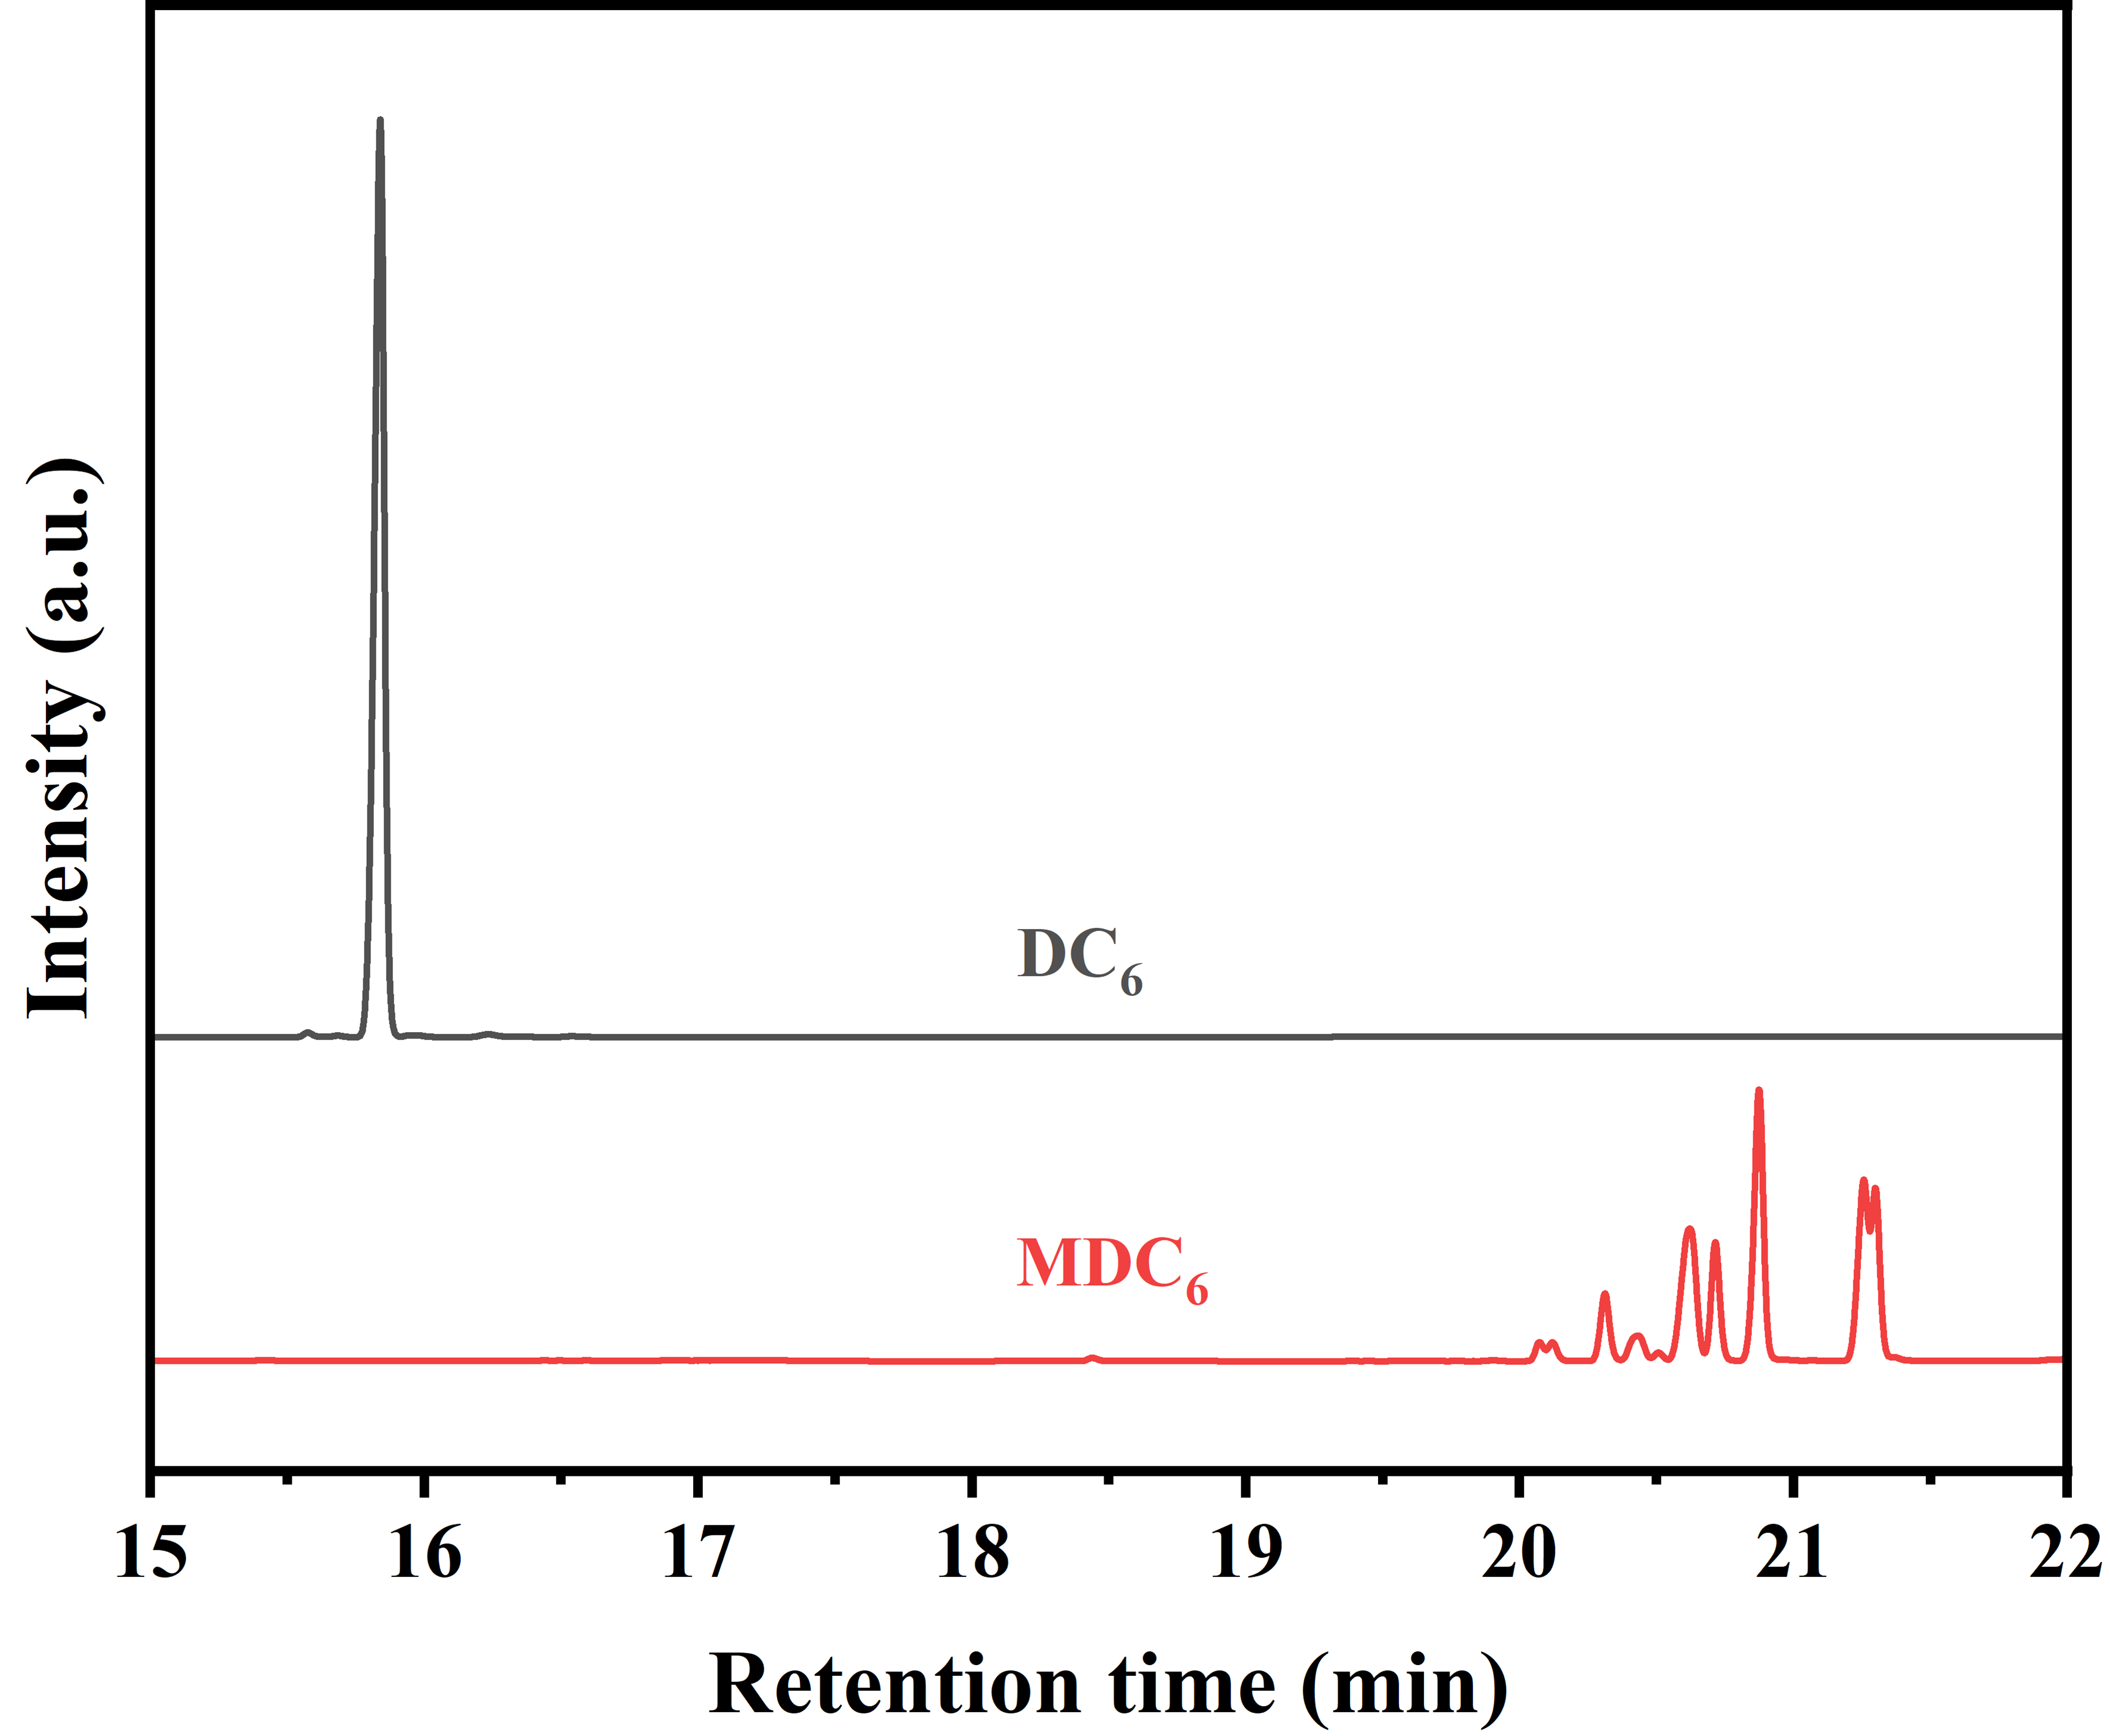


**Figure S1**. Gas chromatogram of MDC6 and DC6

***1.2 GC-MS***

**(1) Di-hexene (DC6)**


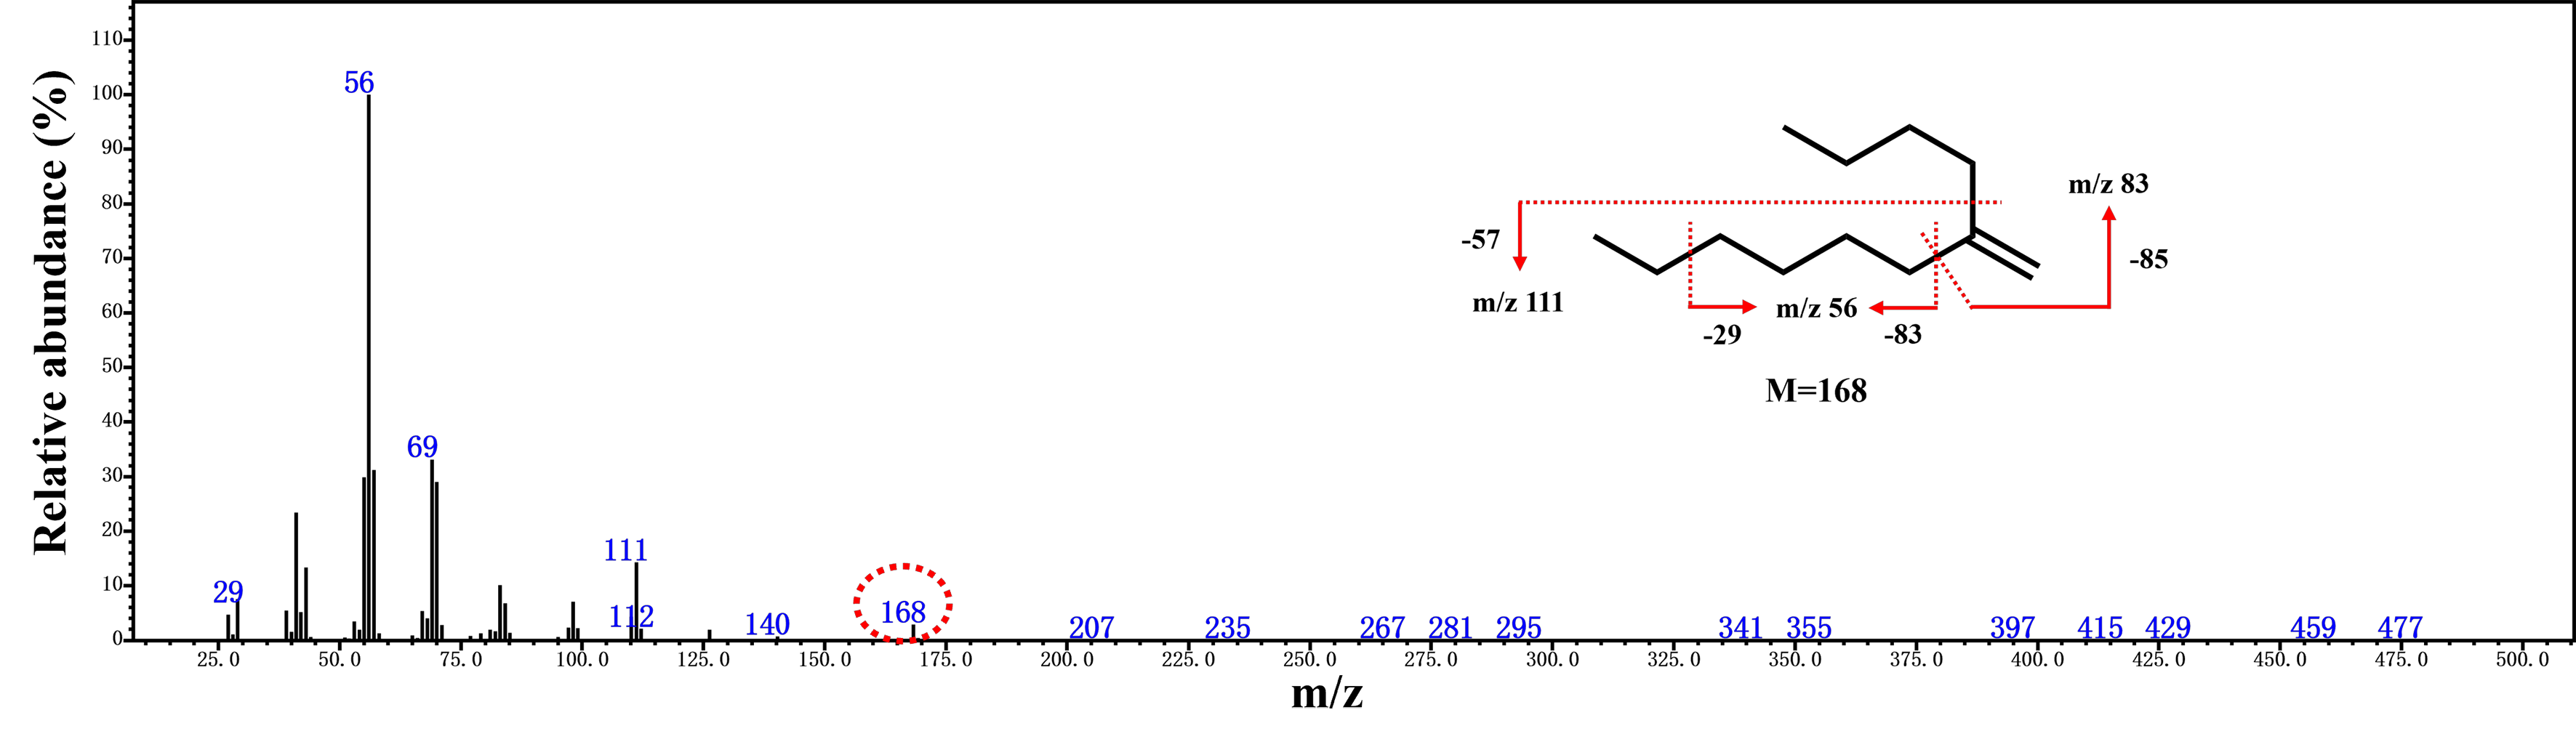


**(2) Aldehyde**


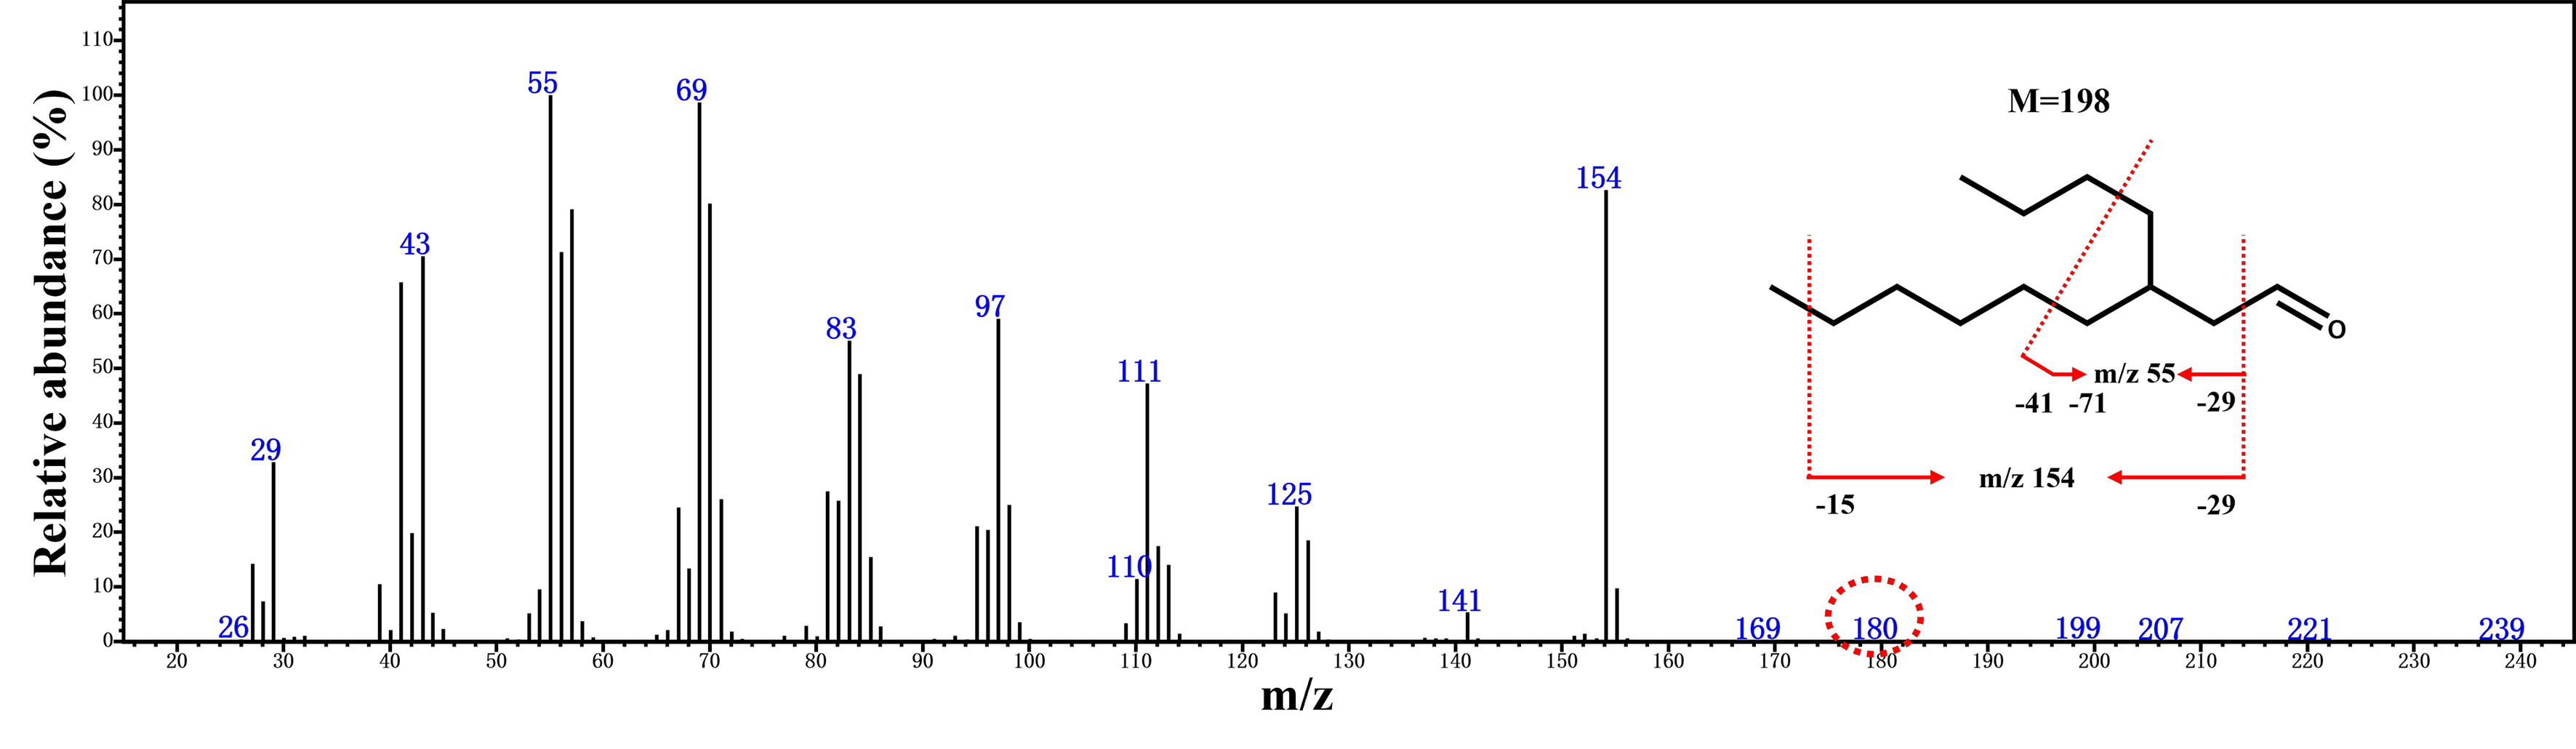


**(3) Alcohol**


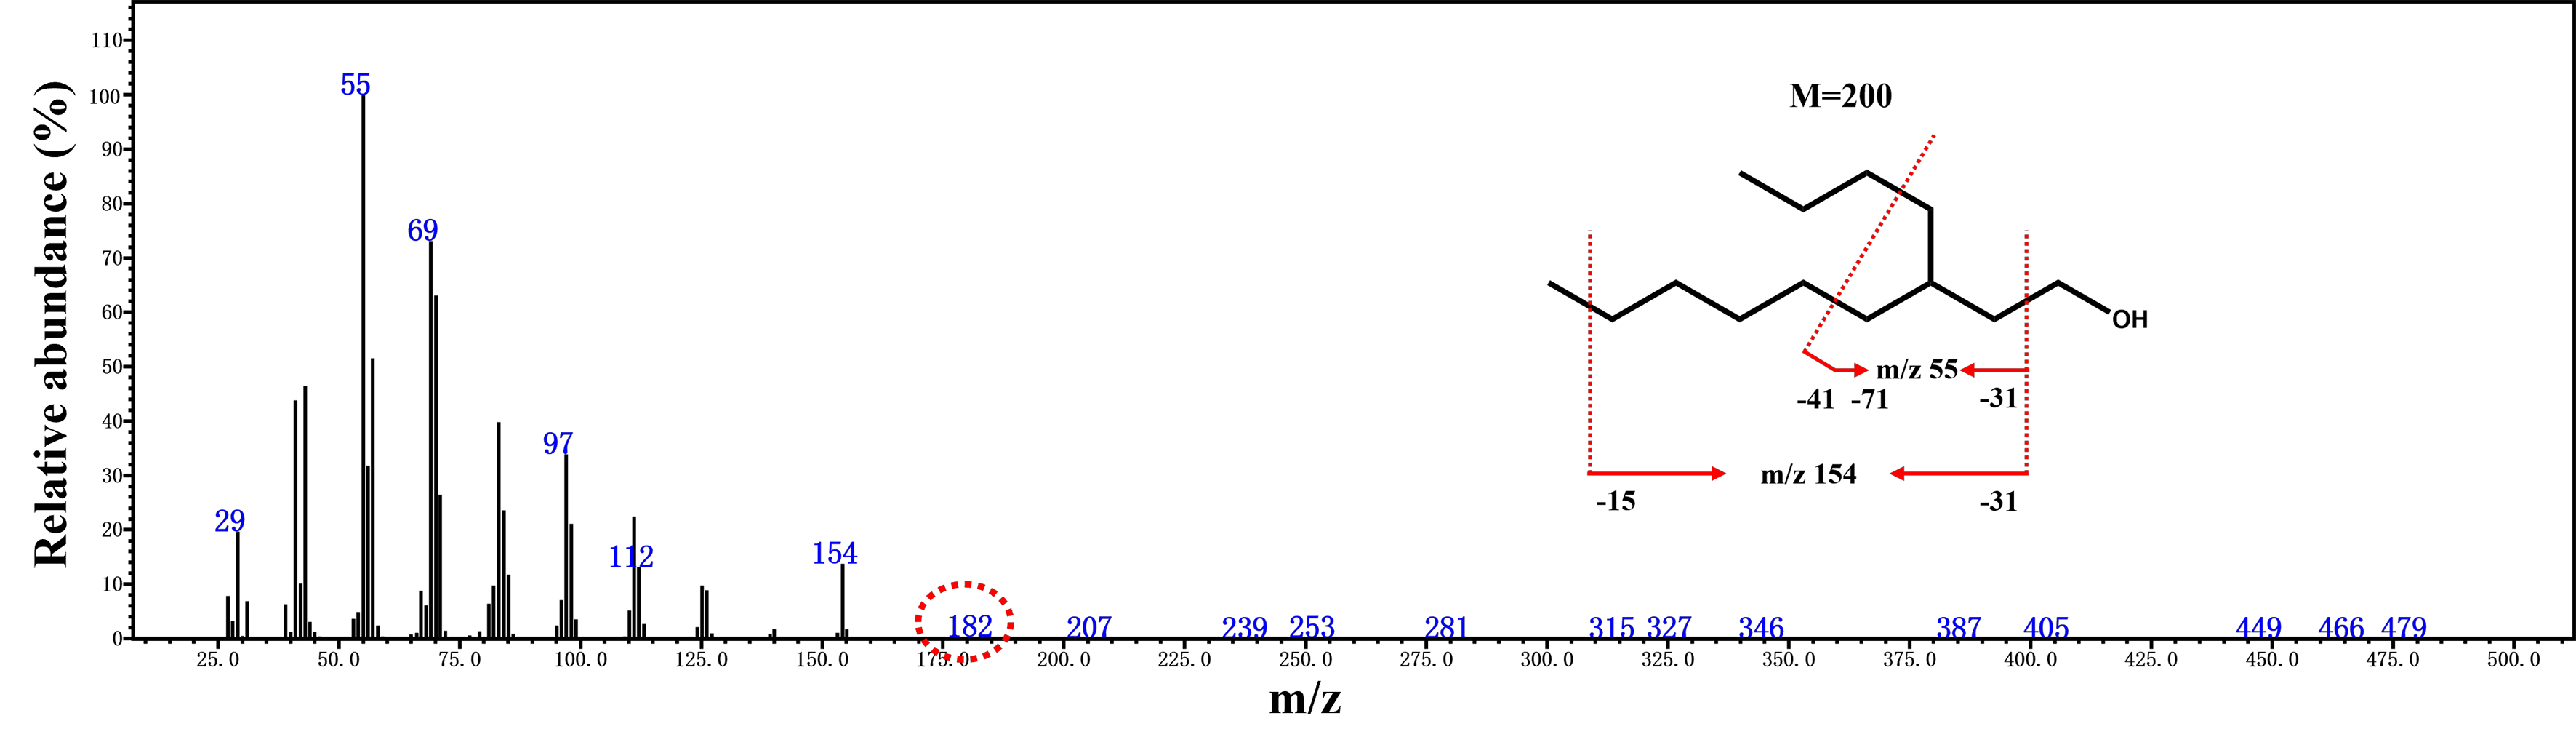


**Figure S2**. Mass spectrum of DC6 and its hydroformylation products (typical substances).

***1.3 FT-IR***


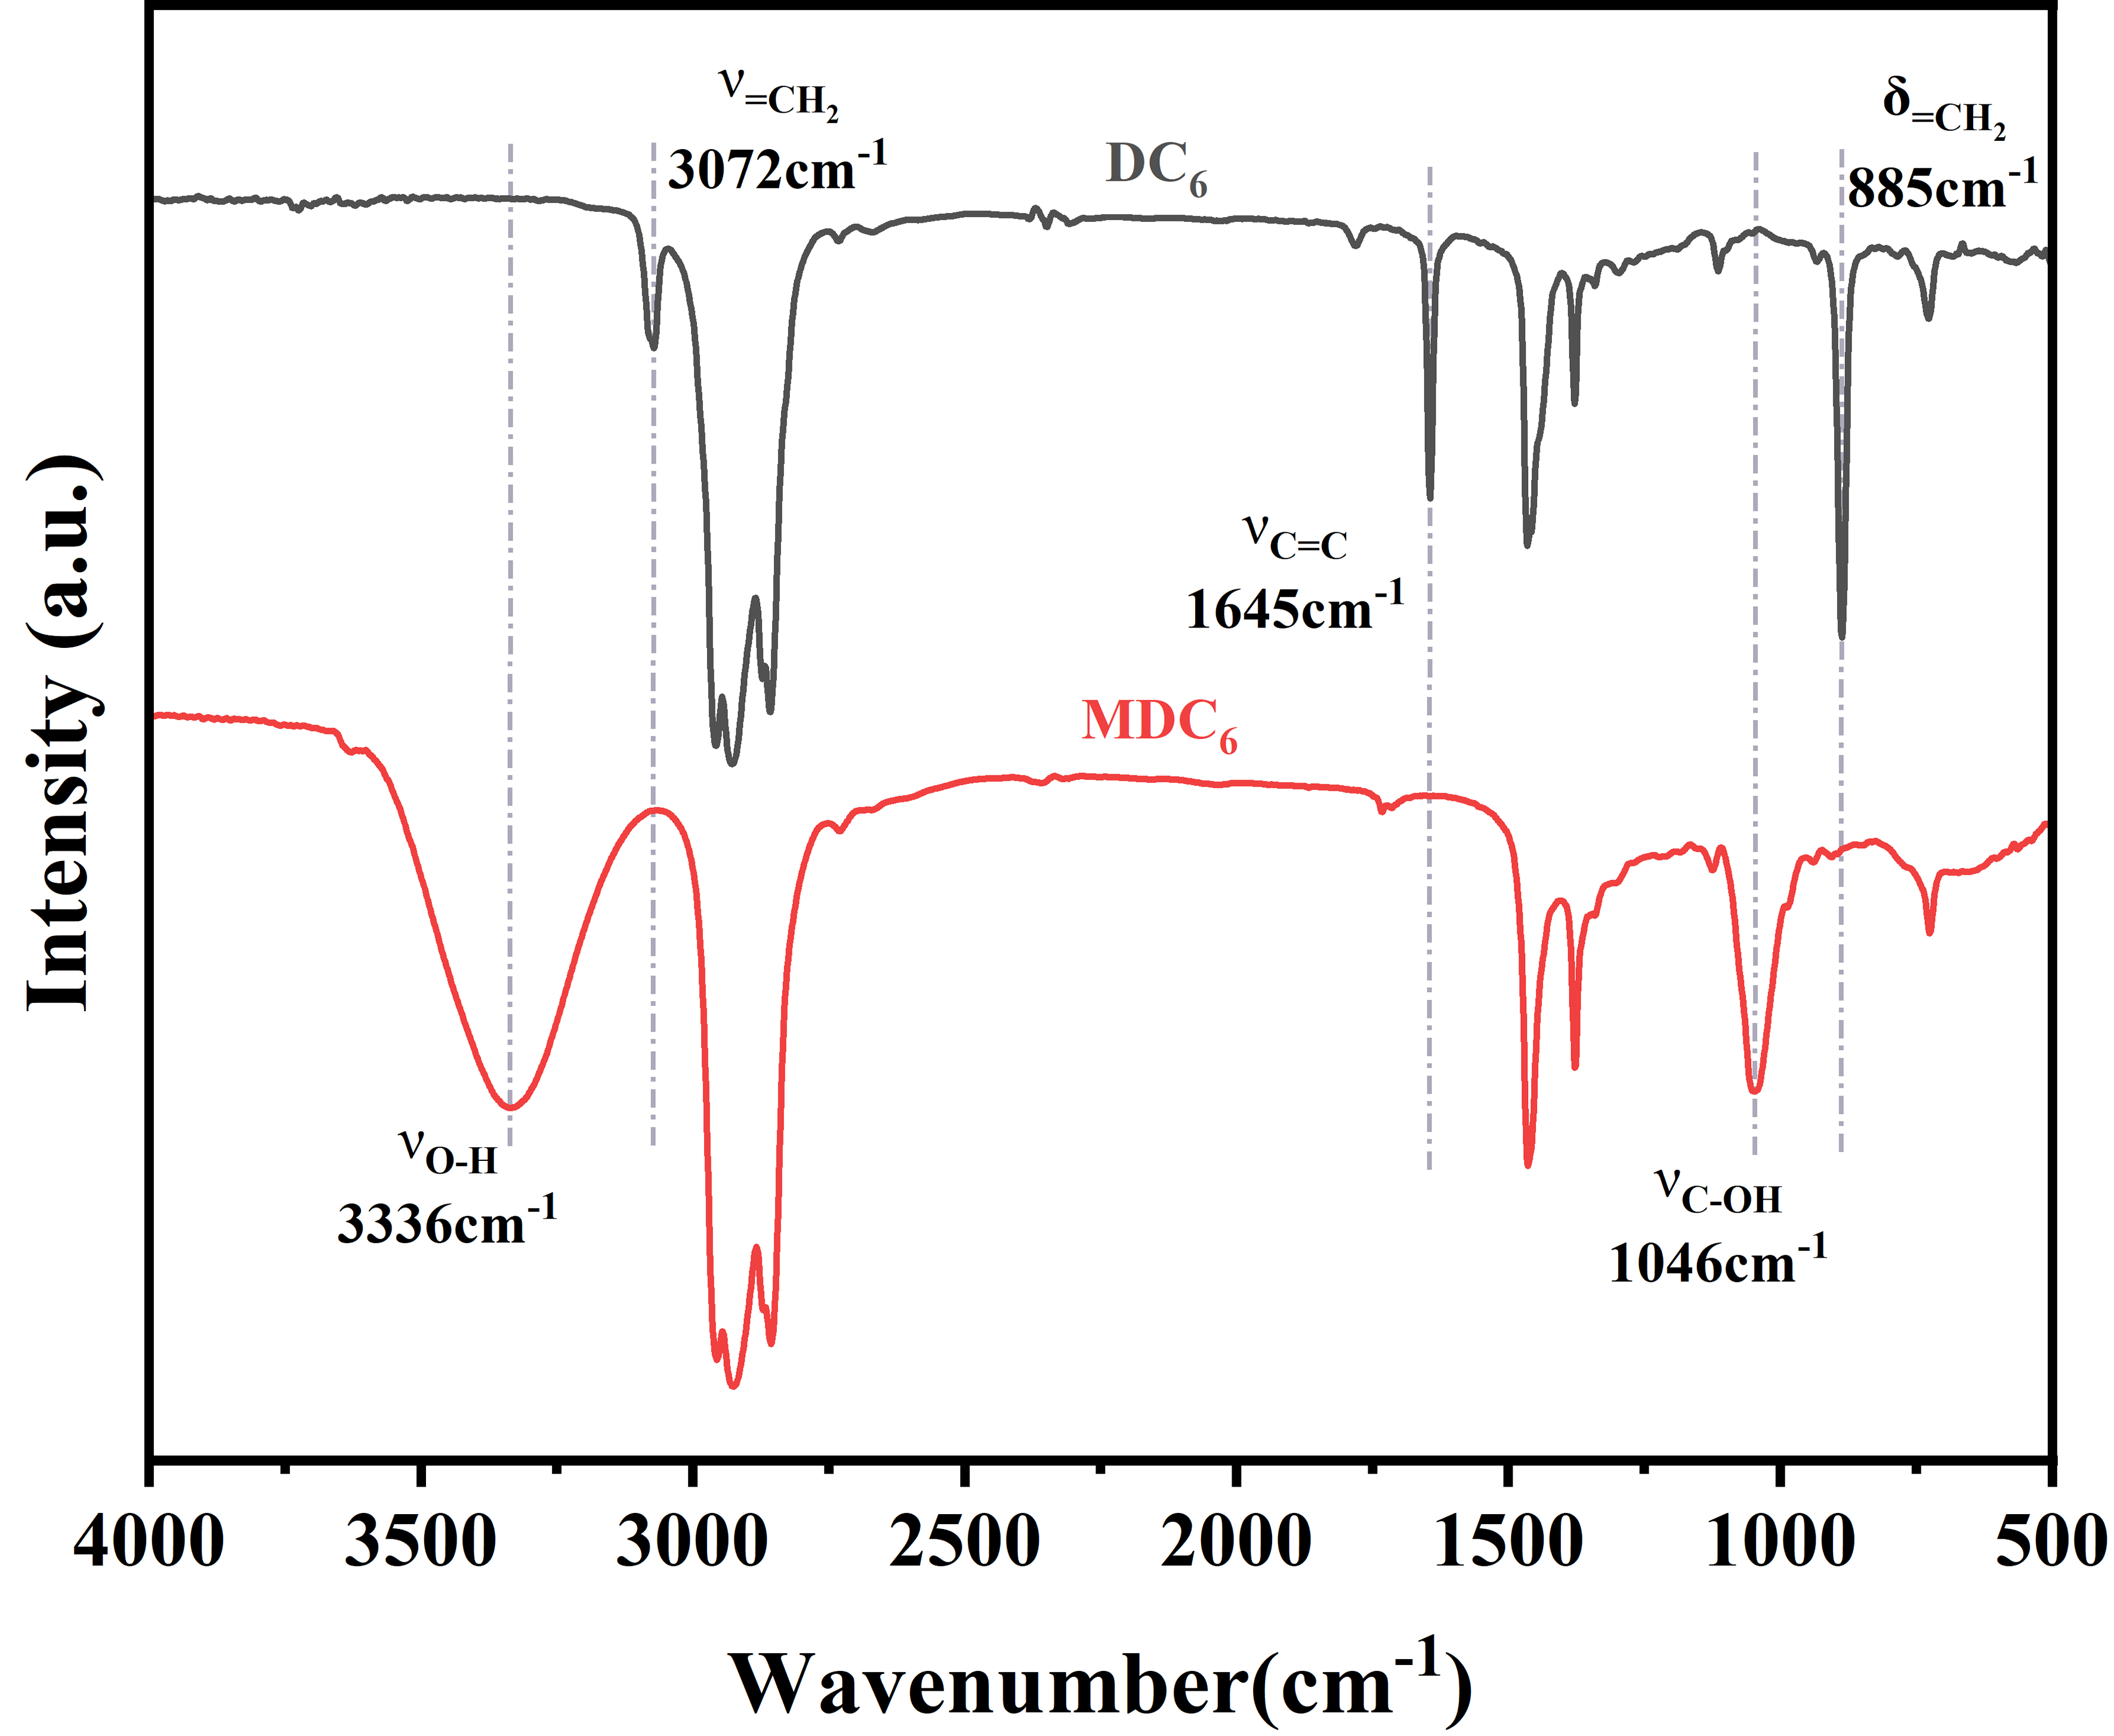


**Figure S3**. FT-IR spectra of MDC6 and DC6.


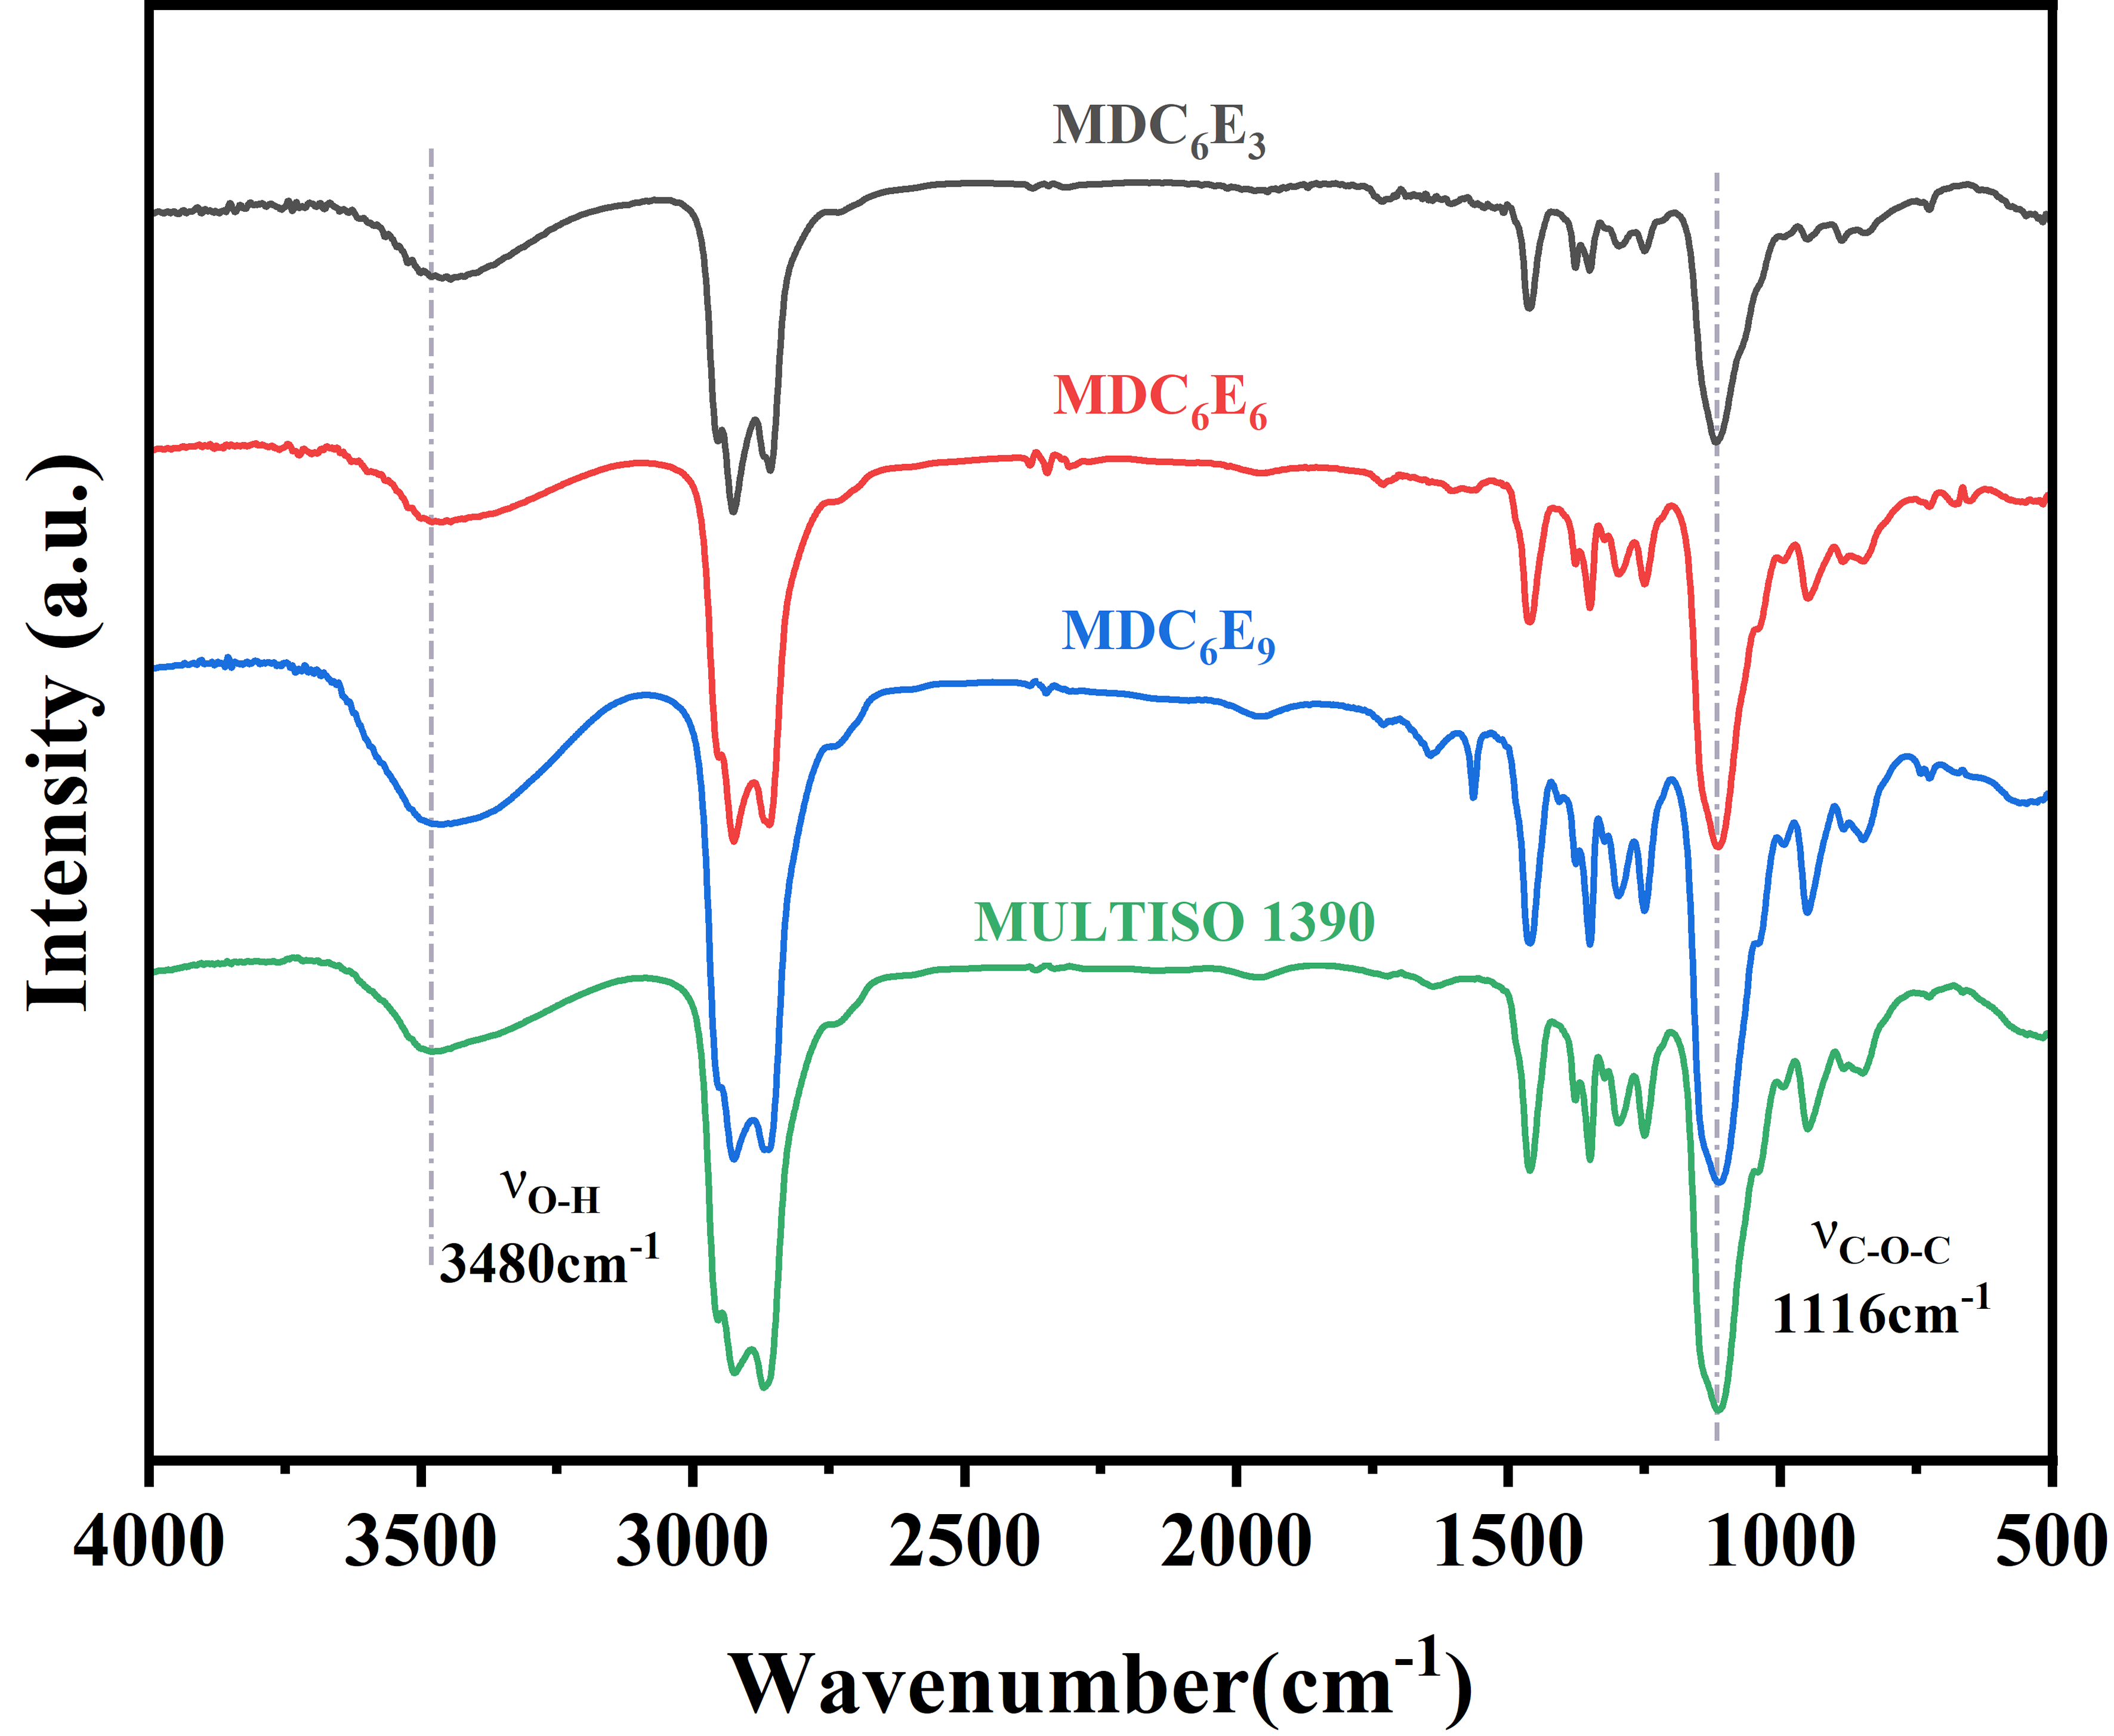


**Figure S4**. FT-IR spectra of MDC6 En and MULTISO 1390.

***1.4 1H-NMR***


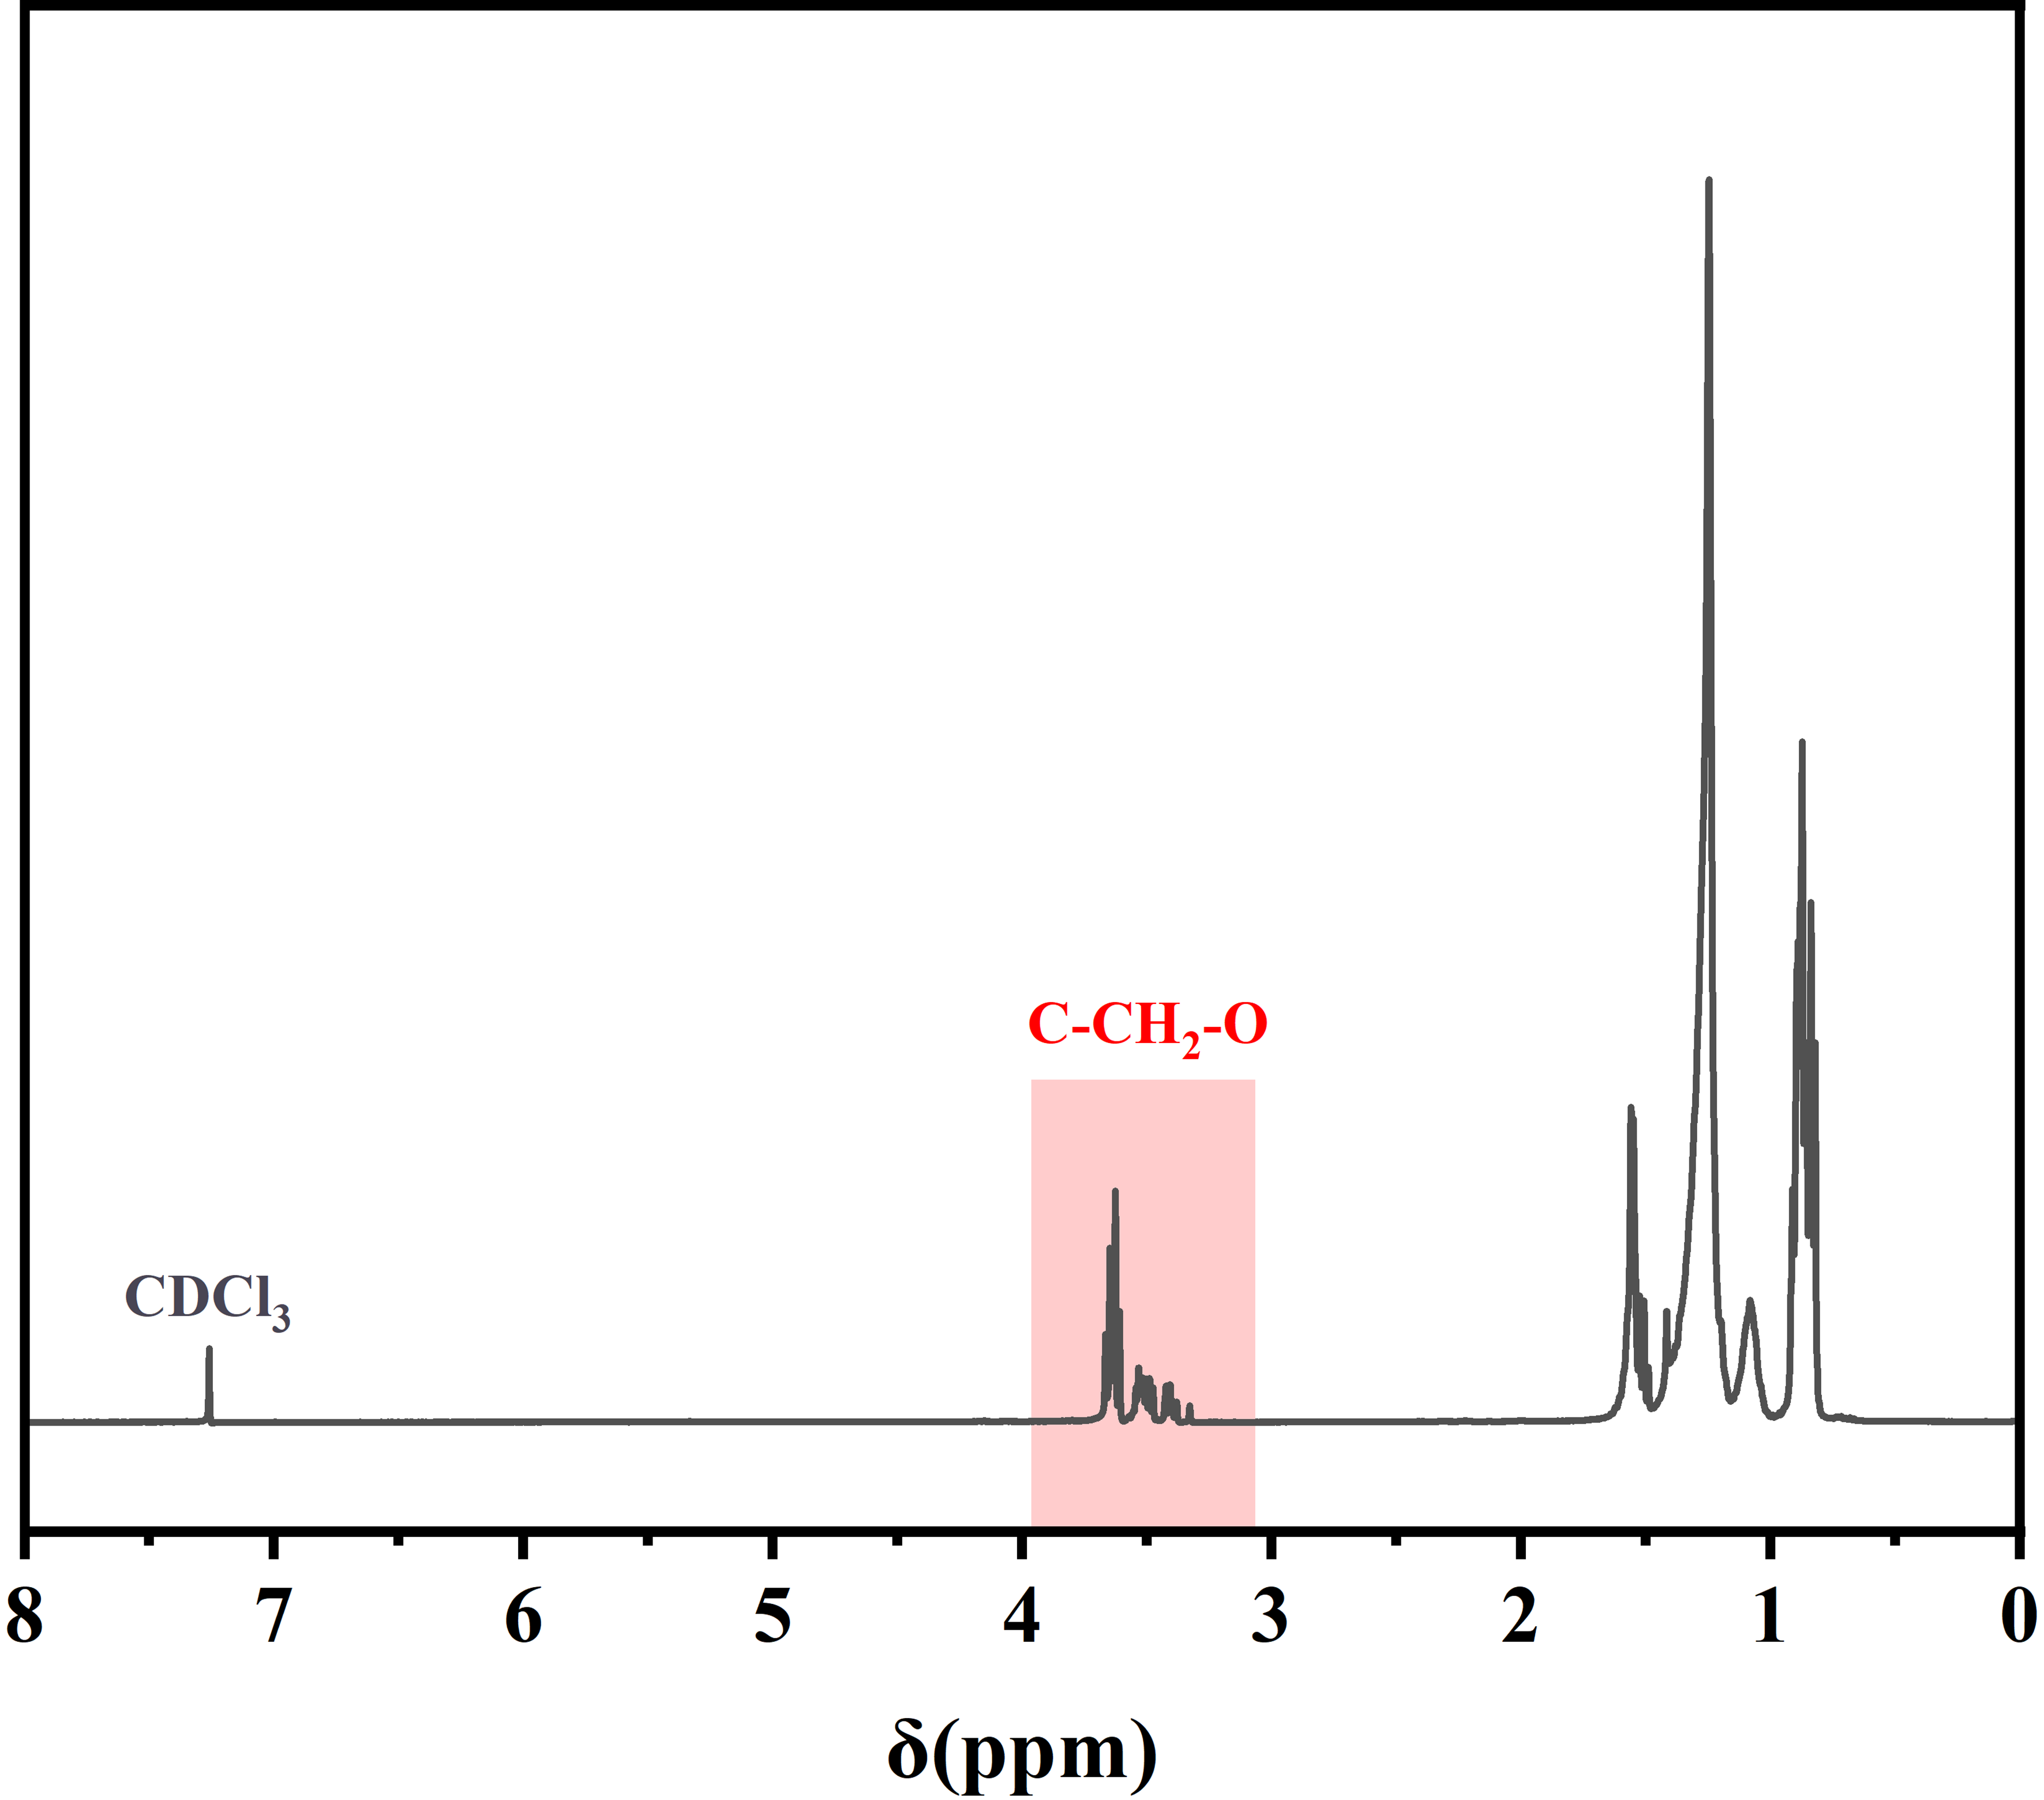


**Figure S5**. 1H NMR spectra of MDC6.


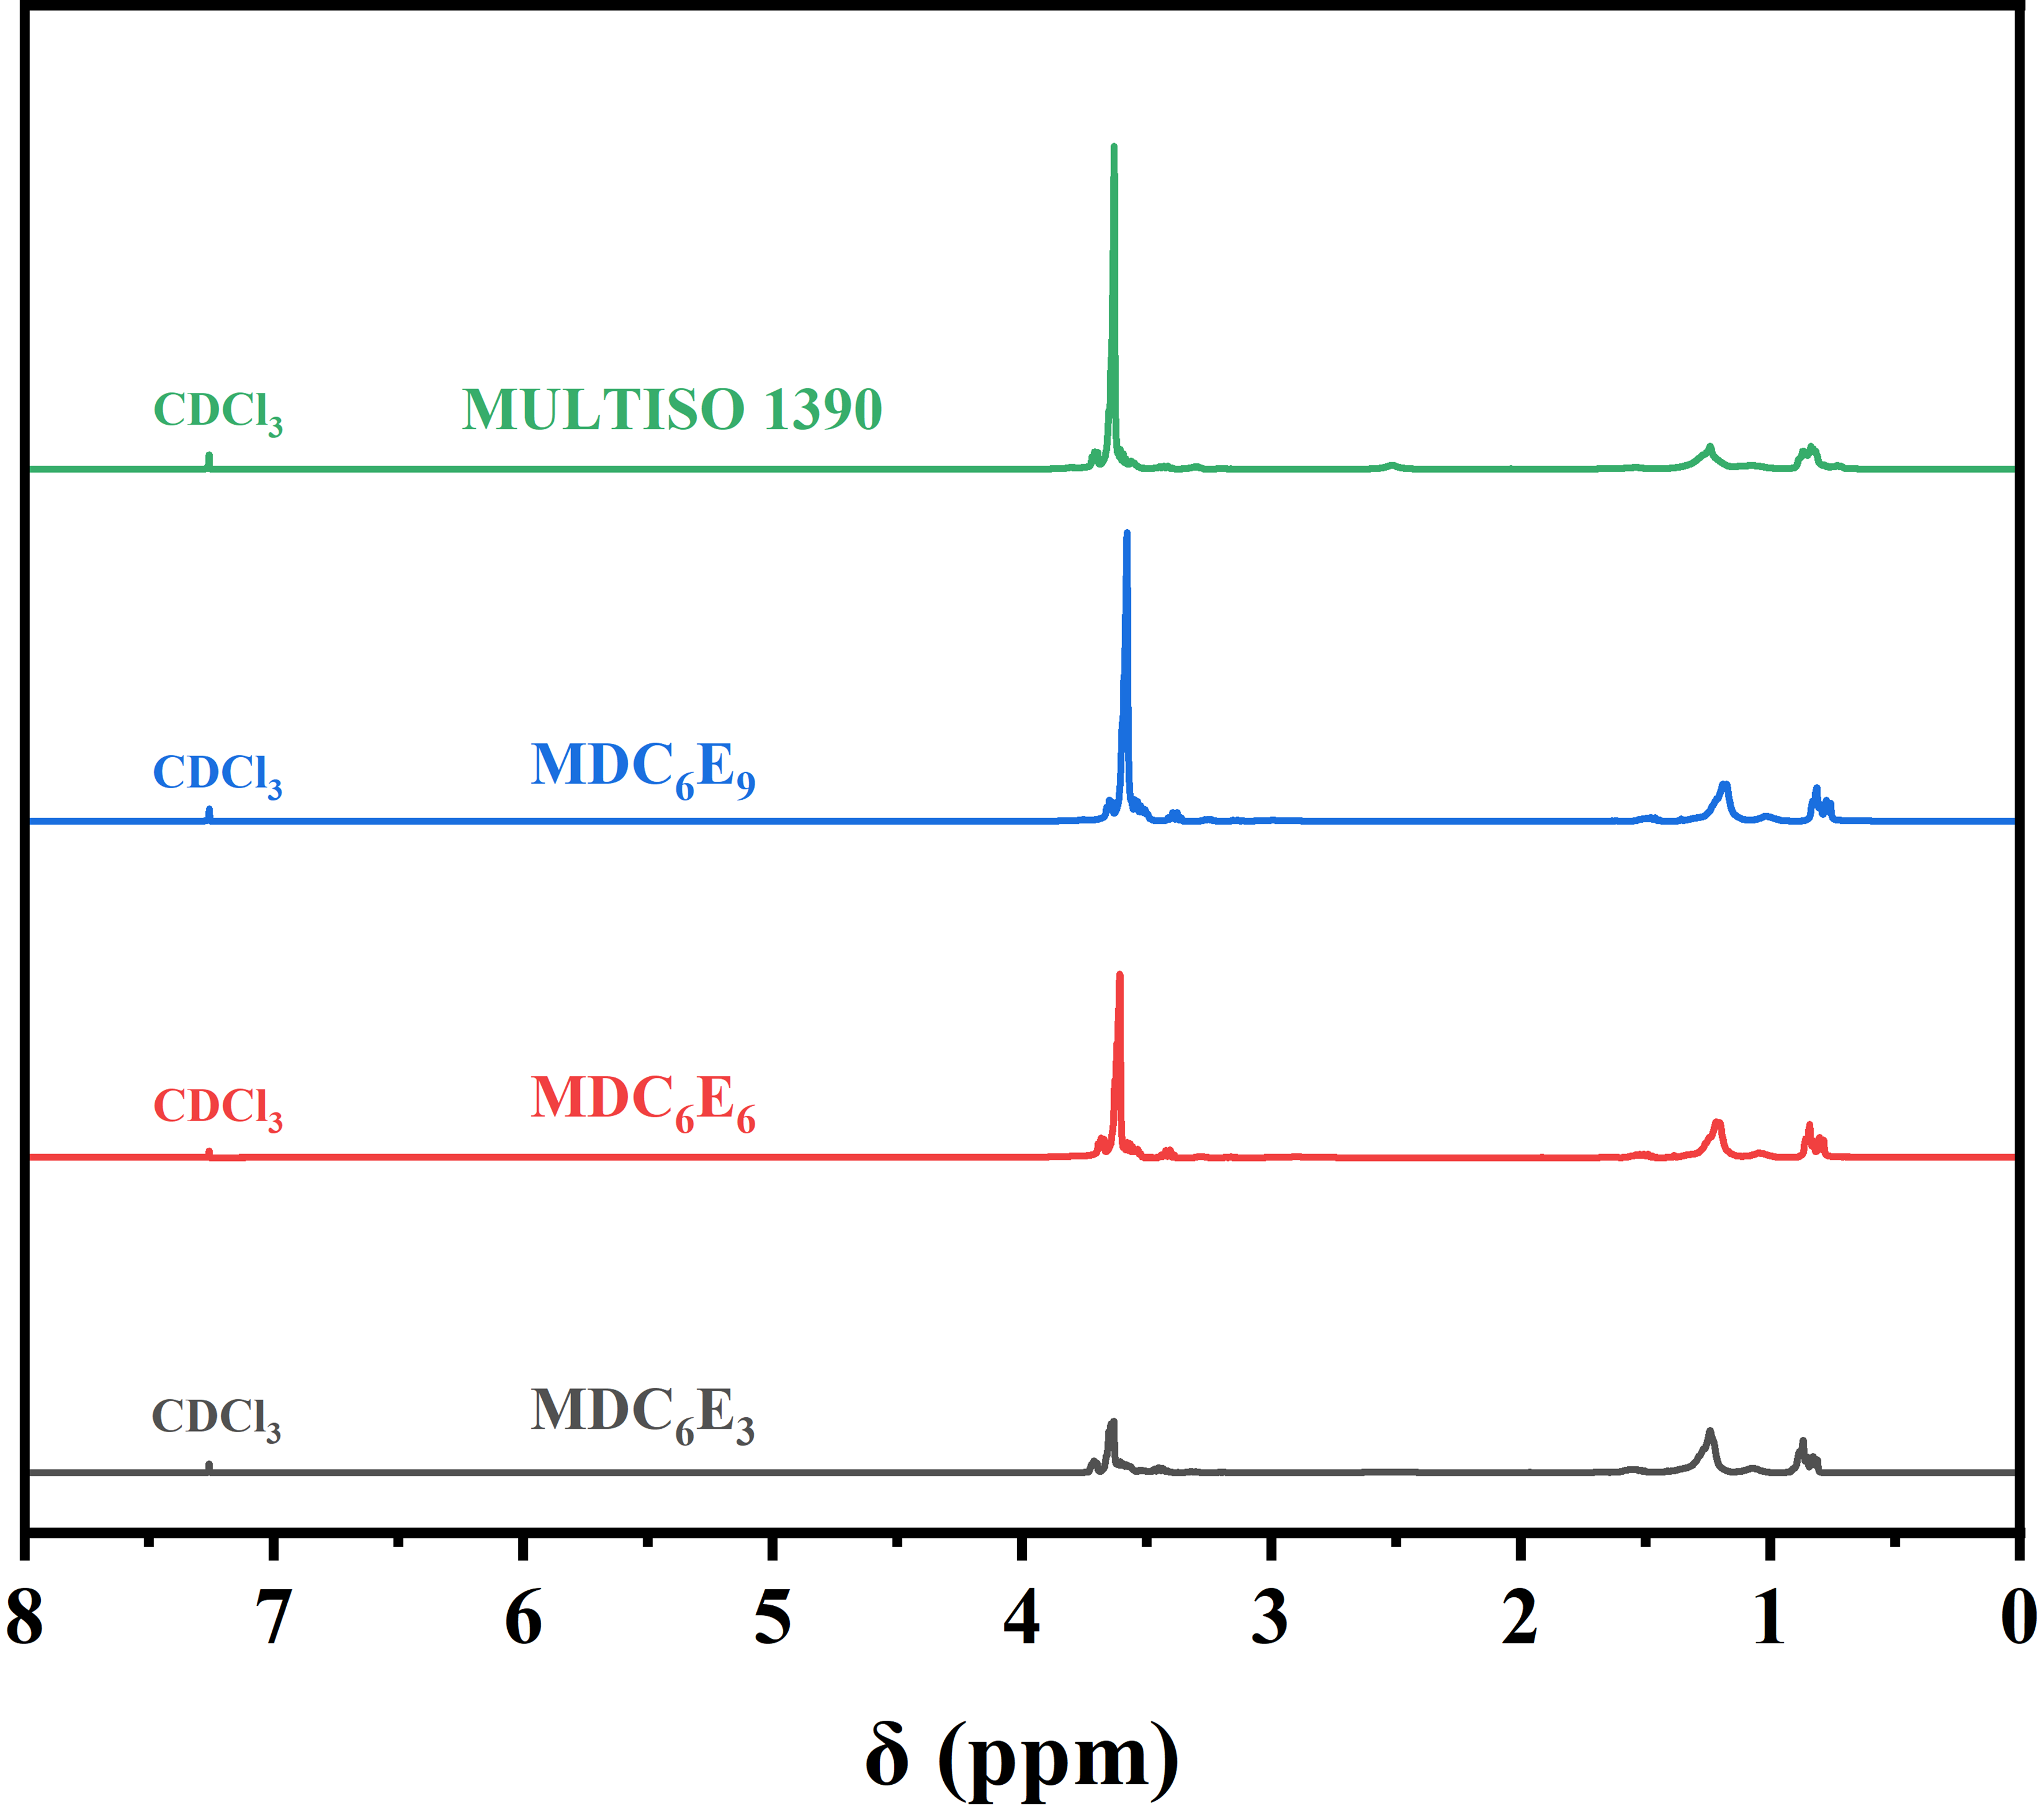


**Figure S6**. 1H NMR spectra of MDC6En and MULTISO 1390.

**2. Short-term and Long-term dynamic surface tension.**


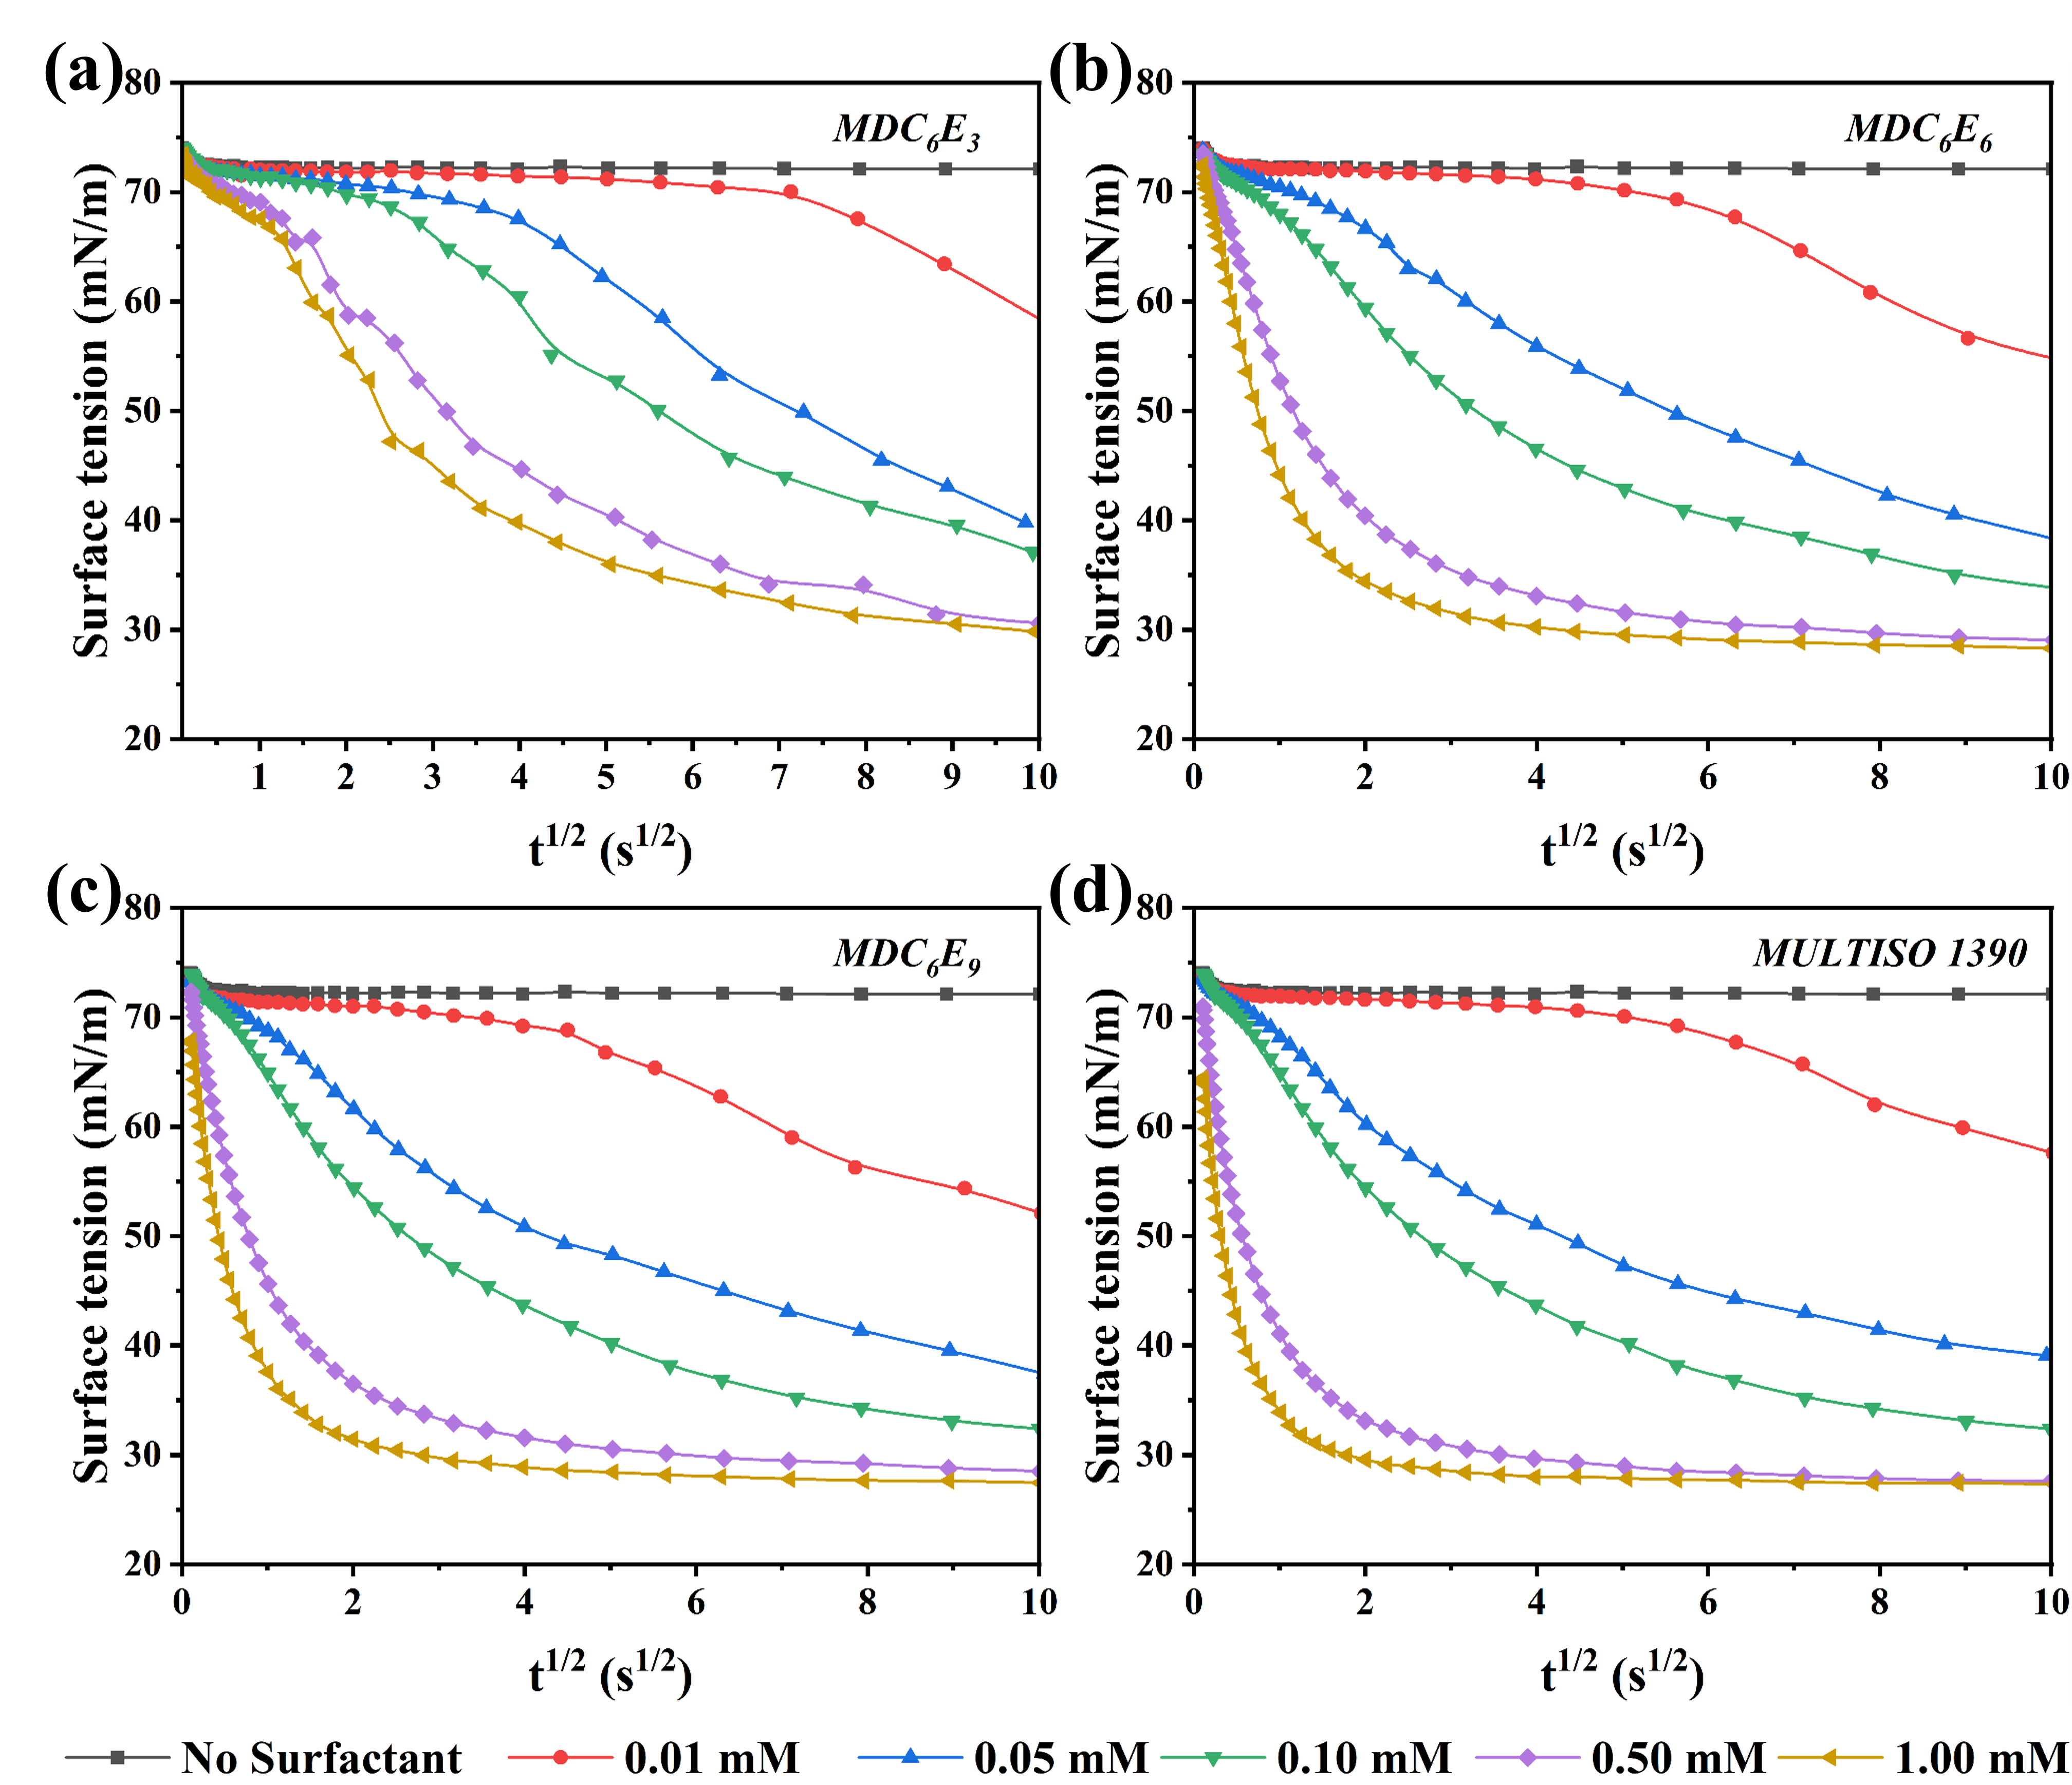


**Figure S7**. Short-term dynamic surface tension (t1/2) of MDC6En, MULTISO 1390 and TX-10.


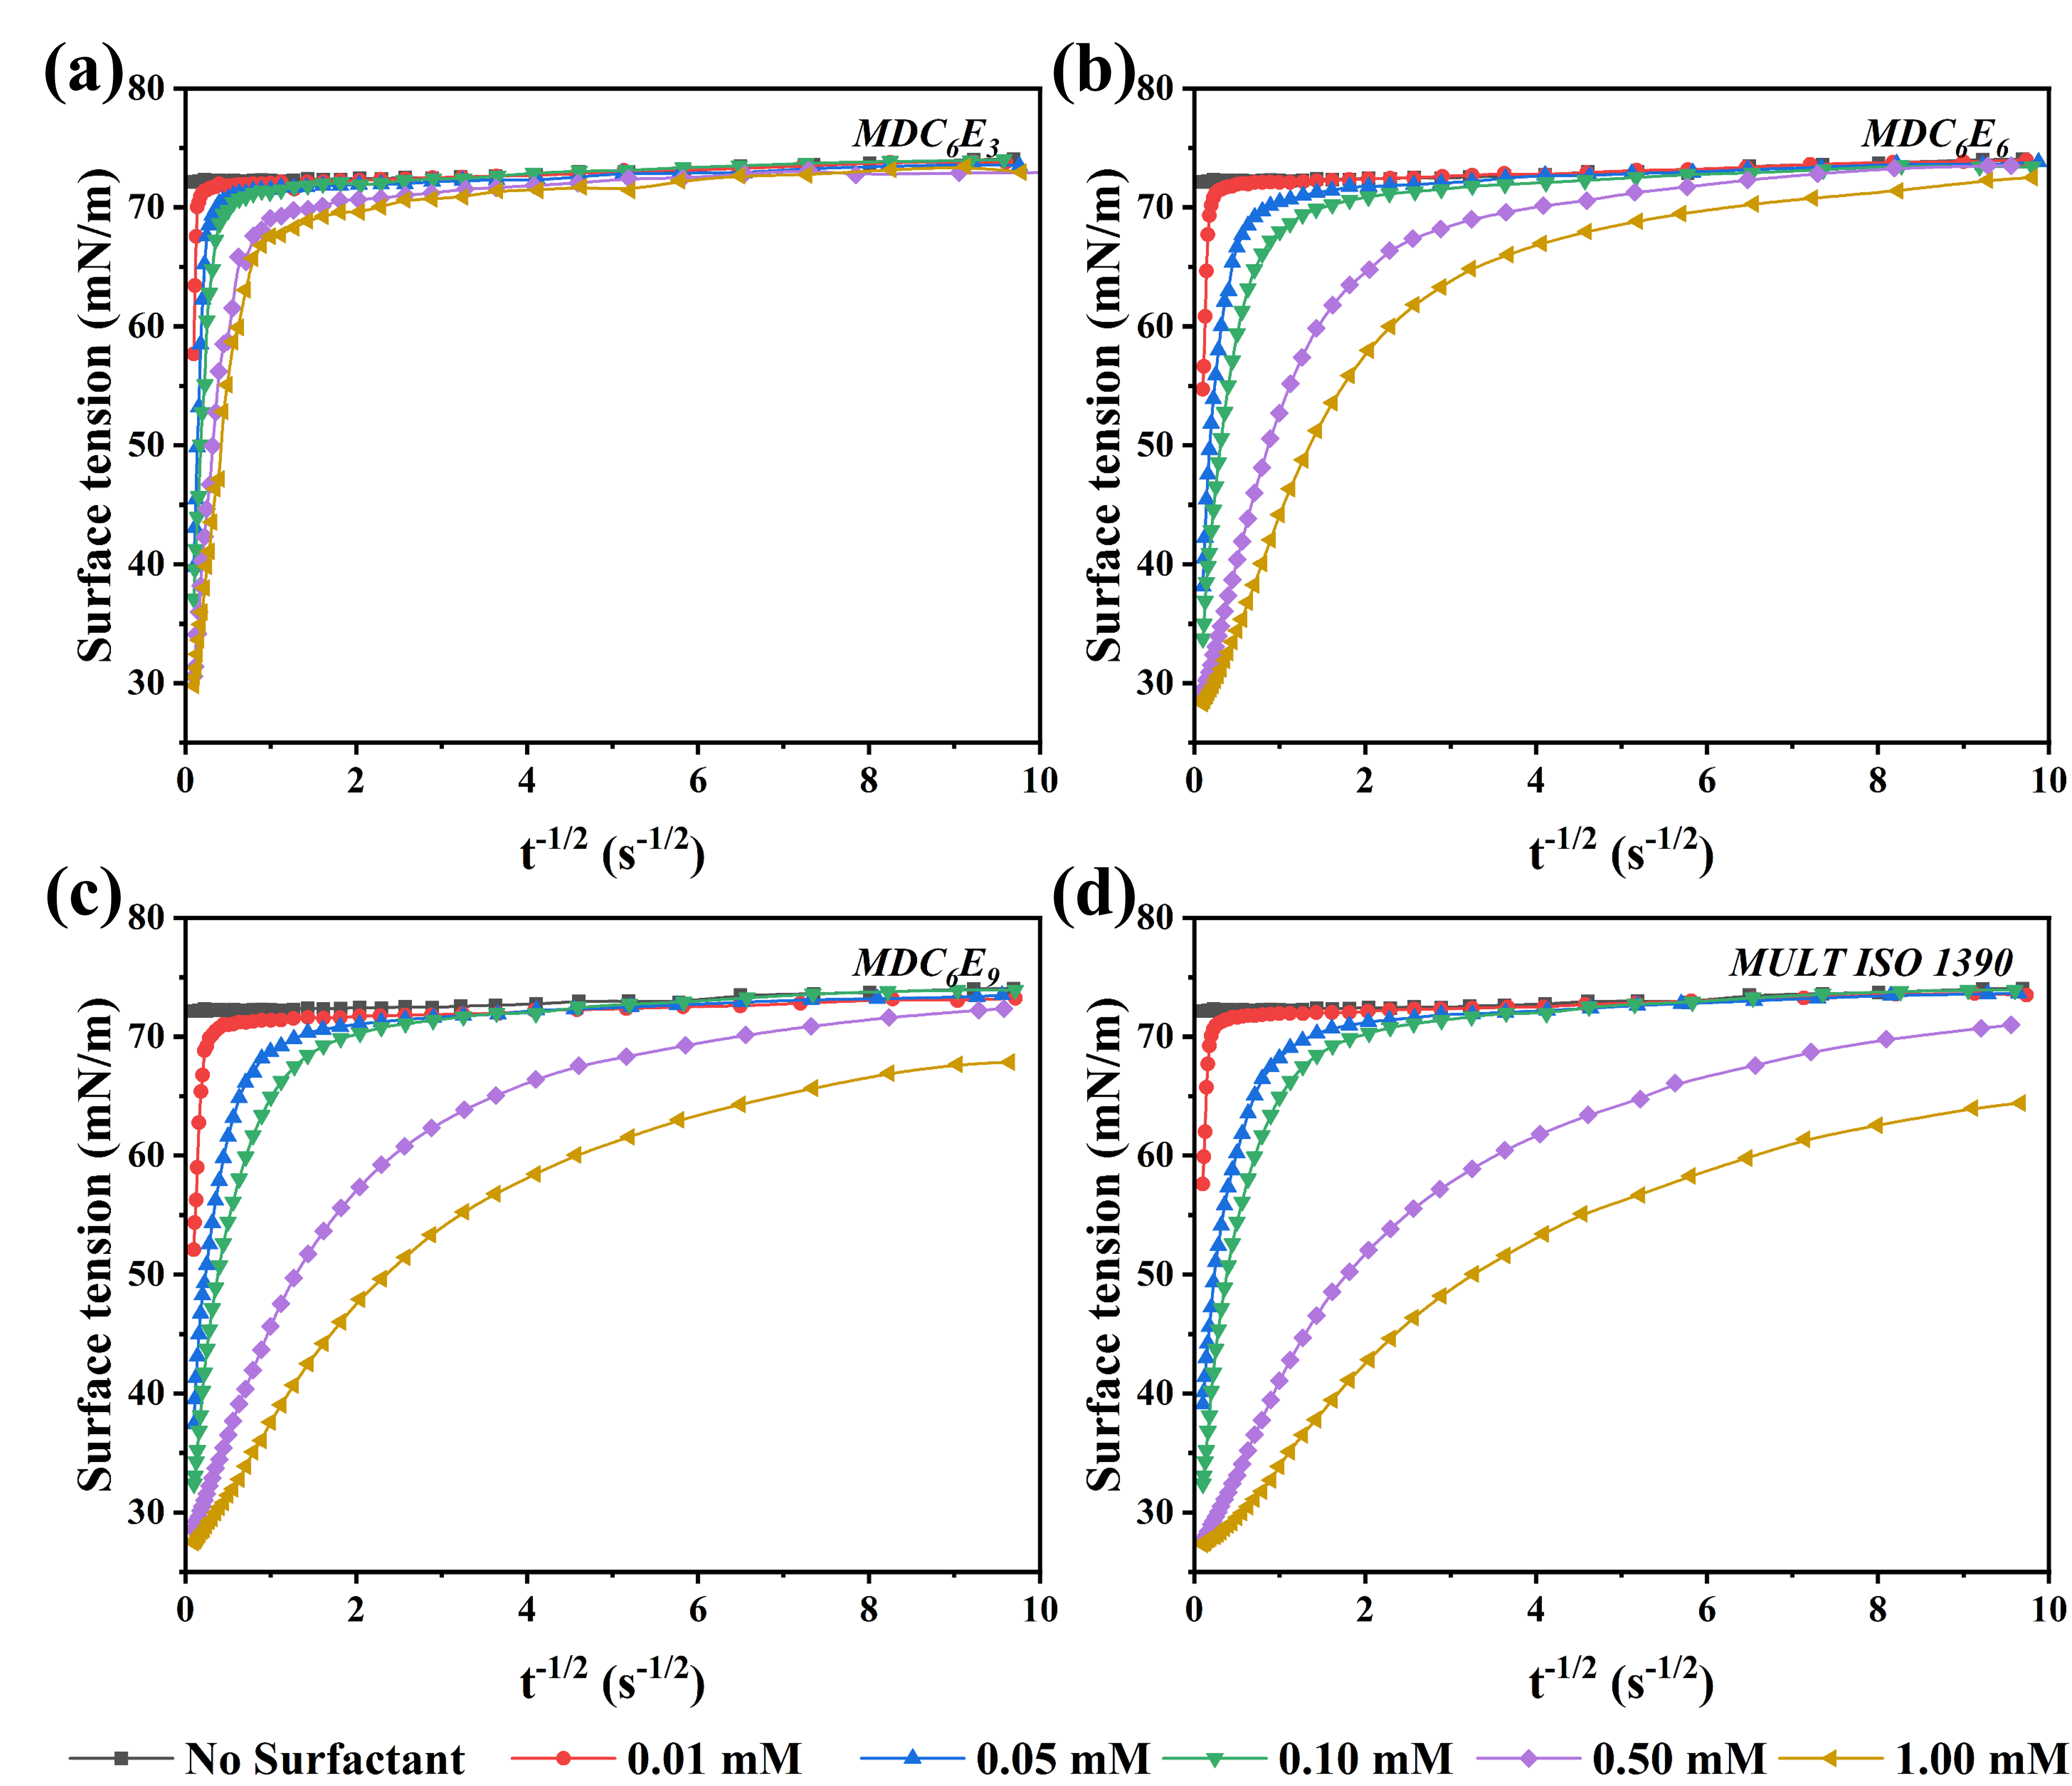


**Figure S8**. Long-term dynamic surface tension (t-1/2) of MDC6En, MULTISO 1390 and TX-10.

**3. Diffusion coefficients**

**Table S1**. Diffusion coefficients of aqueous surfactant solutions at 25 °C.

| Surfactant diffusion | Concentration (mM) | MDC6E3 | MDC6E6 | MDC6E9 | MULTISO 1390 |
| --- | --- | --- | --- | --- | --- |
| Dshort(m2·s-1) | 0.01 | 1.64×10-7 | 1.60×10-7 | 1.47×10-7 | 9.28×10-8 |
| 0.05 | 6.47×10-9 | 6.54×10-9 | 6.58×10-9 | 8.01×10-9 |
| 0.10 | 1.25×10-9 | 1.40×10-9 | 3.05×10-9 | 3.07×10-9 |
| 0.50 | 1.37×10-11 | 3.64×10-10 | 1.10×10-9 | 2.37×10-9 |
| 1.00 | 2.33×10-11 | 2.17×10-10 | 6.81×10-10 | 1.04×10-9 |
| Dlong(m2·s-1) | 0.01 | 1.21×10-9 | 2.61×10-10 | 3.22×10-10 | 4.63×10-10 |
| 0.05 | 2.09×10-11 | 1.87×10-11 | 2.43×10-11 | 5.91×10-11 |
| 0.10 | 1.20×10-11 | 1.10×10-11 | 1.14×10-11 | 1.96×10-11 |
| 0.50 | 1.42×10-12 | 6.57×10-12 | 7.15×10-12 | 2.79×10-11 |
| 1.00 | 6.85×10-13 | 7.37×10-12 | 7.89×10-12 | 3.67×10-11 |
